# Supplementary material
Source: MDPI journal article supplement (https://www.mdpi.com/2075-163X/6/4/112)
Supplement: s1 [file s1 › minerals-06-00112-Table S1.xlsx]

## Sheet: Table S1
Supplementary Materials Table S1. Electron probe microanalytical data for neyite phase, heyrovskyite, aikinite, wittichenite and galena
	B Phase			D Phase				Neyite Ideal end-member	Cuproneyite	Cu-bearing cuproneyite	Cu-enriched cuproneyite (ideal)	Ag-Bi-substitituted heyrovskyite	8,8L synthetic homologue			Heyrovskyite		Aikinite		Wittichenite		Galena
	mean (n=29)			mean (n=15)				Ilinca et al. (2012) #11 [76]	Ilinca et al. (2012) #1 [76]	Ilinca et al. (2012) #2 [76]	Ilinca et al. (2012) #10 [76]	Makovicky et al. (1991)** [74]	Topa et al. (2010) #1 [81]			mean (n=4)		mean (n=5)		n=1		mean (n=3)
Wt.%															Wt.%
Cu	3.20284			4.87648				2.83	3.34	4.96	5.26				Cu	0.25389		10.5333		38.6215		0.0538793
Ag	1.61078			1.87259				0.8	0.3	0.32		6.73	11.88		Ag	2.6226		0.296471		0.309528		0.947285
Pb	37.791			35.3563				41.47	40.1	39	38.99	41.24	26.06		Pb	55.7483		32.8318		<mdl		82.6001
Cd	0.0530507			<mdl								0.27			Cd	<mdl		<mdl		<mdl		<mdl
Bi	39.1299			39.5381				38.73	39.59	39.36	39.33	35.52	35.78		Bi	24.659		37.2908		39.4753		1.67763
Sb	0.0491164			0.0413755								0.04			Sb	<mdl		<mdl		<mdl		<mdl
S	16.3685			16.6398				16.16	16.12	16.3	16.41	15.96	16.42		S	15.1946		16.7926		19.7184		13.4094
Te	0.198266			0.238598					0.12	0.13					Te	0.18429		0.212954		<mdl		0.201645
Se	0.0818458			0.0807277					0.14	0.11		0.03			Se	0.0859023		0.0931042		<mdl		0.074559
Total	98.4853			98.6439				100	99.71	100.18	100	99.79	100.15		Total	98.7486		98.0511		98.1247		98.9645
Formulae	(127 apfu)	(17 apfu)*		(127 apfu)	(129 apfu)	(17 apfu)*		(127 apfu)	(127 apfu)	(129 apfu)	(129 apfu)	(17 apfu)	(19 apfu)		Formulae	(17 apfu)		(6 apfu)		(7apfu)		(2 apfu)
Cu	6.74465	0.902828		9.983	10.1402	1.33631		6.00704	7.07186	10.3966	10.9961				Cu	0.0761532		0.963622		3.00742		0.0020256
Ag	1.99837	0.267498		2.25846	2.29402	0.302313		1.00041	0.374217	0.39516		1.15	2.16		Ag	0.463435		0.0159785		0.0141997		0.0209811
Sum (Cu+Ag)	8.74302	1.17033		12.2415	12.4342	1.63862		7.00745	7.44608	10.7917	10.9961	1.15	2.16		Pb	5.12885		0.92126		0		0.952488
Pb	24.4095	3.26742		22.2007	22.5504	2.97175		26.9995	26.0423	25.0738	25.0007	3.67	2.47		Cd	-		-		-		-
Cd	0.063157	0.00845408		-	-	-						0.04			Bi	2.2492		1.03742		0.934764		0.0191796
Bi	25.0578	3.3542		24.614	25.0016	3.29478		24.9996	25.4908	25.0885	25.0027	3.13	4.3		Sb	-		-		-		-
Sb	0.053988	0.00722674		0.0442125	0.0449087	0.0059182									Sum M	7.91764		2.93828		3.95639		0.994674
S	68.3258	9.14598		67.5233	68.5867	9.03856		67.9935	67.6557	67.7248	68.0006	9.19	10.06		S	9.03409		3.04517		3.04361		0.999295
Te	0.207939	0.0278344		0.243269	0.2471	0.0325635			0.126542	0.135711					Te	0.0275302		0.00970267		-		0.00377558
Se	0.138717	0.0185684		0.13301	0.135105	0.0178045			0.238574	0.185571					Se	0.0207374		0.00685517		-		0.00225601
Sum (S+Se-Te)	68.6725	9.19238		67.8996	68.9689	9.08893		67.9935	68.0208	68.0461	68.0006	9.19	10.06		Sum (S+Se+Te)	9.08236		3.06172		3.04361		1.00533
Charge Metals	133.024			130.617											Charge M	17.5449		5.93437		5.82592		-
Charge (S+Se+Te)	137.345			135.799											Charge (S+Se+Te)	18.1647		6.12345		6.08722		-
mean	135.184			133.208											mean	17.8548		6.02891		5.95657		-
difference	-4.32117			-5.18176											difference	-0.619808		-0.189077		-0.261309		-
diff (%)	-3.1965			-3.88997											diff (%)	-3.47138		-3.13618		-4.3869		-
* the same mean analysis calculated on different apfu basis, as for heyrovskyite
** data originally given by Moëlo et al. (1987) [1]
mdl: minimum detection limit
Reference
1. Moëlo, Y.; Marcoux, E.; Makovicky, E.; Karup-Møller, S.; Legendre, O. Homologues de la lillianite (gustavite, vikingite, heyrovskyite riche en Ag et Bi...) de l’indice à W-As-(Pb, Bi, Ag) de La Roche-Balue (Loire Atlantique, France). Bull. Minéral. 1987, 110, 43–64. (in French)
